# Supplementary material
Source: PubMed Central journal article supplement (PMC6265048)
Supplement: NIHMS995196-supplement-SupplementalFigs_1to4.pdf [file NIHMS995196-supplement-SupplementalFigs_1to4.pdf]

## Supplementary Materials for **Core-binding factor $\beta$ and Runx transcription factors promote adaptive natural killer cell responses**

Moritz Rapp, Colleen M. Lau, Nicholas M. Adams, Orr-El Weizman,  
Timothy E. O'Sullivan, Clair D. Geary, Joseph C. Sun\*

\*Corresponding author. Email: [sunj@mskcc.org](mailto:sunj@mskcc.org)

Published 8 December 2017, *Sci. Immunol.* **2**, eaan3796 (2017)  
DOI: 10.1126/sciimmunol.aan3796

### **The PDF file includes:**

- Fig. S1. Epigenetic regulation by STAT4 in cytokine-stimulated NK cells.
- Fig. S2. Cell-intrinsic requirement of CBF- $\beta$  for the development of mature NK cells.
- Fig. S3. CBF- $\beta$  is critical for NK cell survival after homeostatic proliferation.
- Fig. S4. Runx1- or Runx3-deficient mice have normal NK cell numbers.

**Other Supplementary Material for this manuscript includes the following:**  
(available at [immunology.sciencemag.org/cgi/content/full/2/18/eaan3796/DC1](http://immunology.sciencemag.org/cgi/content/full/2/18/eaan3796/DC1))

Table S1 (Microsoft Excel format). Raw data for Figs. 3 to 6 and figs. S3 and S4.

## Supplementary Figures:

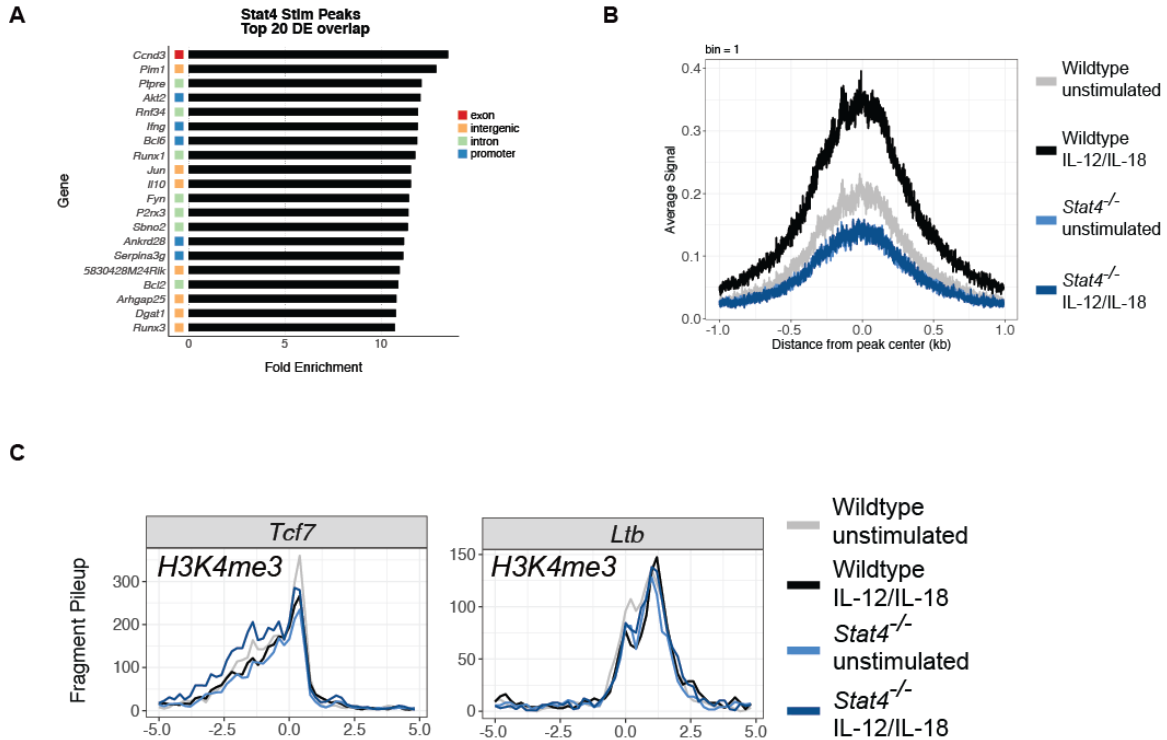

**Fig. S1. Epigenetic regulation by STAT4 in cytokine-stimulated NK cells.** Splenic NK cells (TCR $\beta$ <sup>-</sup>CD19<sup>-</sup>CD3 $\epsilon$ <sup>-</sup>Ly6G<sup>-</sup>TER119<sup>-</sup>TCR $\gamma\delta$ <sup>-</sup>NK1.1<sup>+</sup>) were isolated from either WT or *Stat4*<sup>-/-</sup> mice and stimulated with IL-12 and IL-18, or media alone as a control (unstimulated). STAT4 and H3K4me3 chromatin immunoprecipitation were performed, followed by high-throughput DNA sequencing. RNA-seq was performed on splenic Ly49H<sup>+</sup> WT NK cells and *Stat4*<sup>-/-</sup> NK cells sorted from mixed chimeras two days following MCMV infection. **(A)** Top 20 genes bound by STAT4 and differentially expressed in RNA-seq data ( $p_{adj} < 0.05$ ), ranked on fold change over input calculated by MACS2. **(B)** Meta-peak of all H3K4me3 non-promoter regions. Overlap of midpoints of ChIP fragments (defined as regions between properly paired sequence reads) for each

peak region were counted for each base pair  $\pm$  1kb from the annotated peak center. Line plot depicts average signal for all regions for each base pair. **(C)** H3K4me3 signals from *Tcf7* and *Ltb* loci plotted as normalized fragment counts binned at 200bp across a 10kb window centered on the transcriptional start site.

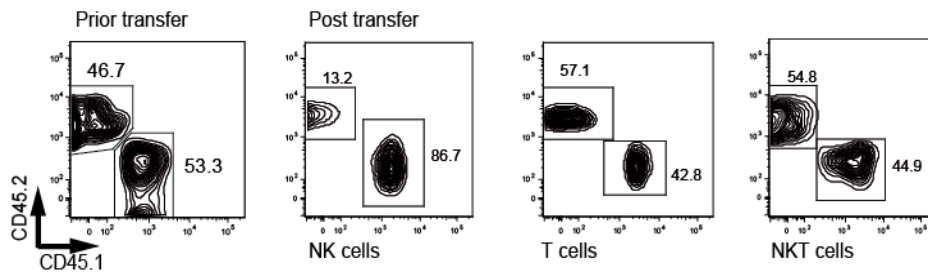

**Fig. S2. Cell-intrinsic requirement of CBF- $\beta$  for the development of mature NK cells.**

*Rag2*<sup>-/-</sup> *x* *Il2rg*<sup>-/-</sup> mice were lethally irradiated and reconstituted with an equal number of bone marrow cells from WT (CD45.1) and *Cbfb*<sup>fl/fl</sup> *x* *NKp46*<sup>iCre</sup> (CD45.2) mice. Representative flow cytometric plots show ratio of CD45.1 and CD45.2 cells before and 28 days post transfer in the blood of recipient mice. Indicated cell types are identified as CD8<sup>+</sup> T cells (TCR $\beta$ <sup>+</sup>CD3 $\epsilon$ <sup>+</sup>CD8<sup>+</sup>), NKT cells (TCR $\beta$ <sup>+</sup>CD3 $\epsilon$ <sup>+</sup>NK1.1<sup>+</sup>) and NK cells (TCR $\beta$ <sup>-</sup>CD3 $\epsilon$ <sup>-</sup>NK1.1<sup>+</sup>). Data are representative of two independent experiments, with n=5 mice.

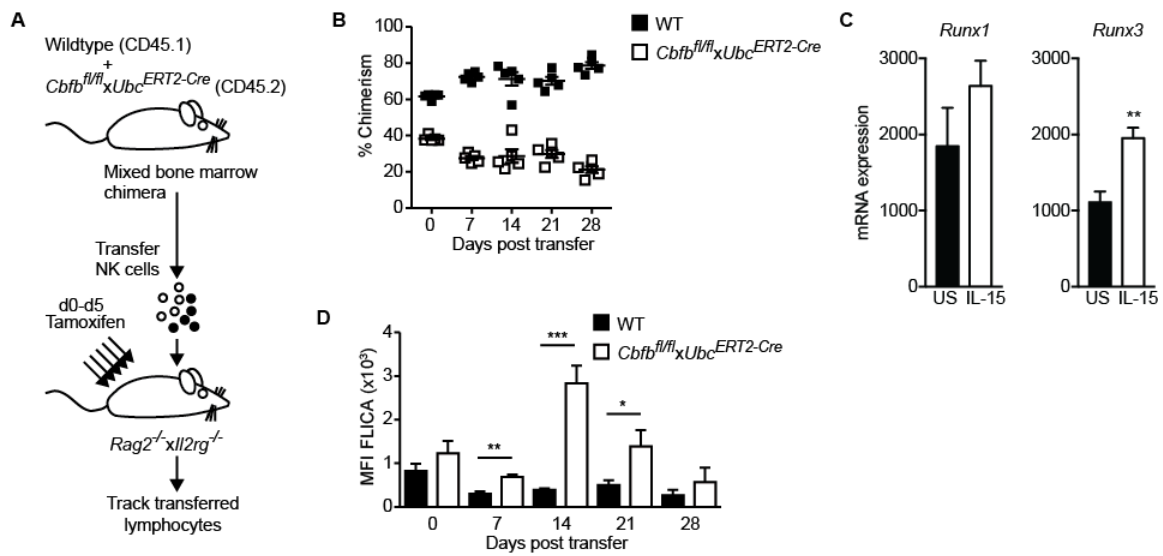

**Fig. S3. CBF- $\beta$  is critical for NK cell survival following homeostatic proliferation.**

(A) NK cells of WT:*Cbfb*<sup>fl/fl</sup> x *Ubc*<sup>ERT2-Cre</sup> mixed bone marrow chimera were adoptively transferred into *Rag2*<sup>-/-</sup> x *Il2rg*<sup>-/-</sup> hosts which were treated with 1 mg of tamoxifen daily for 5 days. (B) Percentages of adoptively transferred WT or *Cbfb*<sup>fl/fl</sup> x *Ubc*<sup>ERT2-Cre</sup> NK cells in the blood are shown for indicated time points after transfer. (C) Normalized counts of *Runx1* and *Runx3* in unstimulated or IL-15 treated splenic NK cells (16 hour stimulation), as assessed by RNA sequencing (n=2 biological replicates per group). (D) FLICA incorporation is shown as mean fluorescence intensity (MFI) of FLICA<sup>+</sup> WT and *Cbfb*<sup>fl/fl</sup> x *Ubc*<sup>ERT2-Cre</sup> NK cells at indicated time points after transfer. Data are mean  $\pm$  s.e.m. and representative of two independent experiments with n=5-6 mice per group (\**P* < 0.05, \*\**P* < 0.01, \*\*\**P* < 0.001).

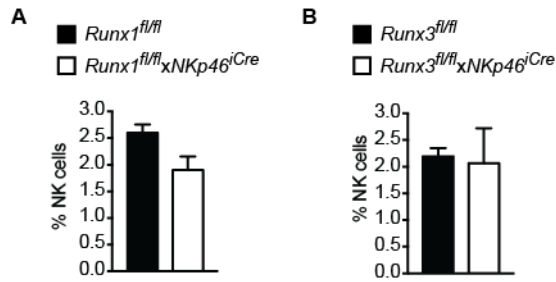

**Fig. S4. Runx1- or Runx3-deficient mice have normal NK cell numbers.** *Runx1<sup>fl/fl</sup>* x *NKp46<sup>iCre</sup>* and *Runx3<sup>fl/fl</sup>* x *NKp46<sup>iCre</sup>* mice were generated. Percentages of NK cells in mice with specific deletion of Runx1 or Runx3 are compared to Cre-negative littermate controls.
